a given degree of depression of myocardial mechanics. Data provided by Dr. Saidman to describe the comparative effects of the anesthetics assume that the concentration of the anesthetics is a linear function of MAC. This has not been demonstrated. Dr. Saidman's interpretation of our data by using multiples of MAC, therefore, gives erroneous information. He used the MAC obtained in man for analysis of cat papillary heart muscle, which may not be justified.

Note, we have taken into account the relative narcotic effect by means of the MAC-1 level, and the concentrations of the anesthetics at a MAC-1 level for animals as described by Eger *et al.* (ANESTHESIOLOGY 30: 129, 1969). The percentage decreases in the components of myocardial mechanics of the isolated cat papillary muscle induced by three agents are shown in table 1.

The percentage decreases in  $V_{max}$ ,  $F_m$ , maximal power, maximal work and maximal  $dF/dt$  were calculated for a given MAC-1 level of each agent, expressed in mg/100 ml using

TABLE 1.  $\Delta$  Decreases in Myocardial Mechanics at MAC-1 (%)

|                | $V_{max}$ | $F_m$ | Max. Power | Max. Work | Max. $dF/dt$ |
|----------------|-----------|-------|------------|-----------|--------------|
| Ethrane        | 12        | 36    | 44         | 50        | 37           |
| Methoxyflurane | 31        | 40    | 55         | 51        | 43           |
| Halothane      | 39        | 35    | 51         | 52        | 45           |

linear regression equations derived for each component. Our data show that percentage decrements in all components of mechanics of contraction of the heart muscle exposed to Ethrane at the MAC-1 level are less than those in muscles exposed to either halothane or methoxyflurane. Evidently, these findings corroborate our previous findings which showed that Ethrane is less depressant to myocardial contractility than methoxyflurane or halothane (ANESTHESIOLOGY 30: 513, 1969).

SHIRO SHIMOSATO, M.D.  
New England Medical  
Center Hospital  
Boston, Mass.

## Drugs

**NEW ANALGESIC** Phenoperidine, a new analgesic, was given to 100 patients of various ages in a dose of one mg/30 kg body weight prior to induction of anesthesia. Sleep was not induced with this drug, but the patients became drowsy within five minutes. The dose of thiopental required for induction of anesthesia was reduced considerably. Respiratory depression was considerable; apnea occurred in 36 patients, most of whom were elderly. Anesthesia was maintained with nitrous oxide-oxygen and fractional doses of phenoperidine, using the respiratory rate as an indicator of the need for more drug (about every 30 minutes when the respiratory rate was faster than 10 beats/min). Tracheobronchial reflexes were also depressed, and the endotracheal tube was well tolerated. The cardiovascular system remained stable. (Viars, P., and Gavreau, T.: *Report on the Use of Phenoperidine*, *Anesth. Analg.* 25: 163 (March) 1968.)
